# Supplementary material for: Improving Depression Care for Adults With Serious Mental Illness in Underresourced Areas: Community Coalitions Versus Technical Support
Source: Atypon-hosted journal article supplement (doi:10.1176/appi.ps.201600514), 2017-10-16
Supplement: appi.ps.201600514.ds001.pdf [file appi.ps.201600514.ds001.pdf]

**Trial profile**

Agency/  
program  
enrollment

Randomization

Client Enrollment

Follow-up

Analysis

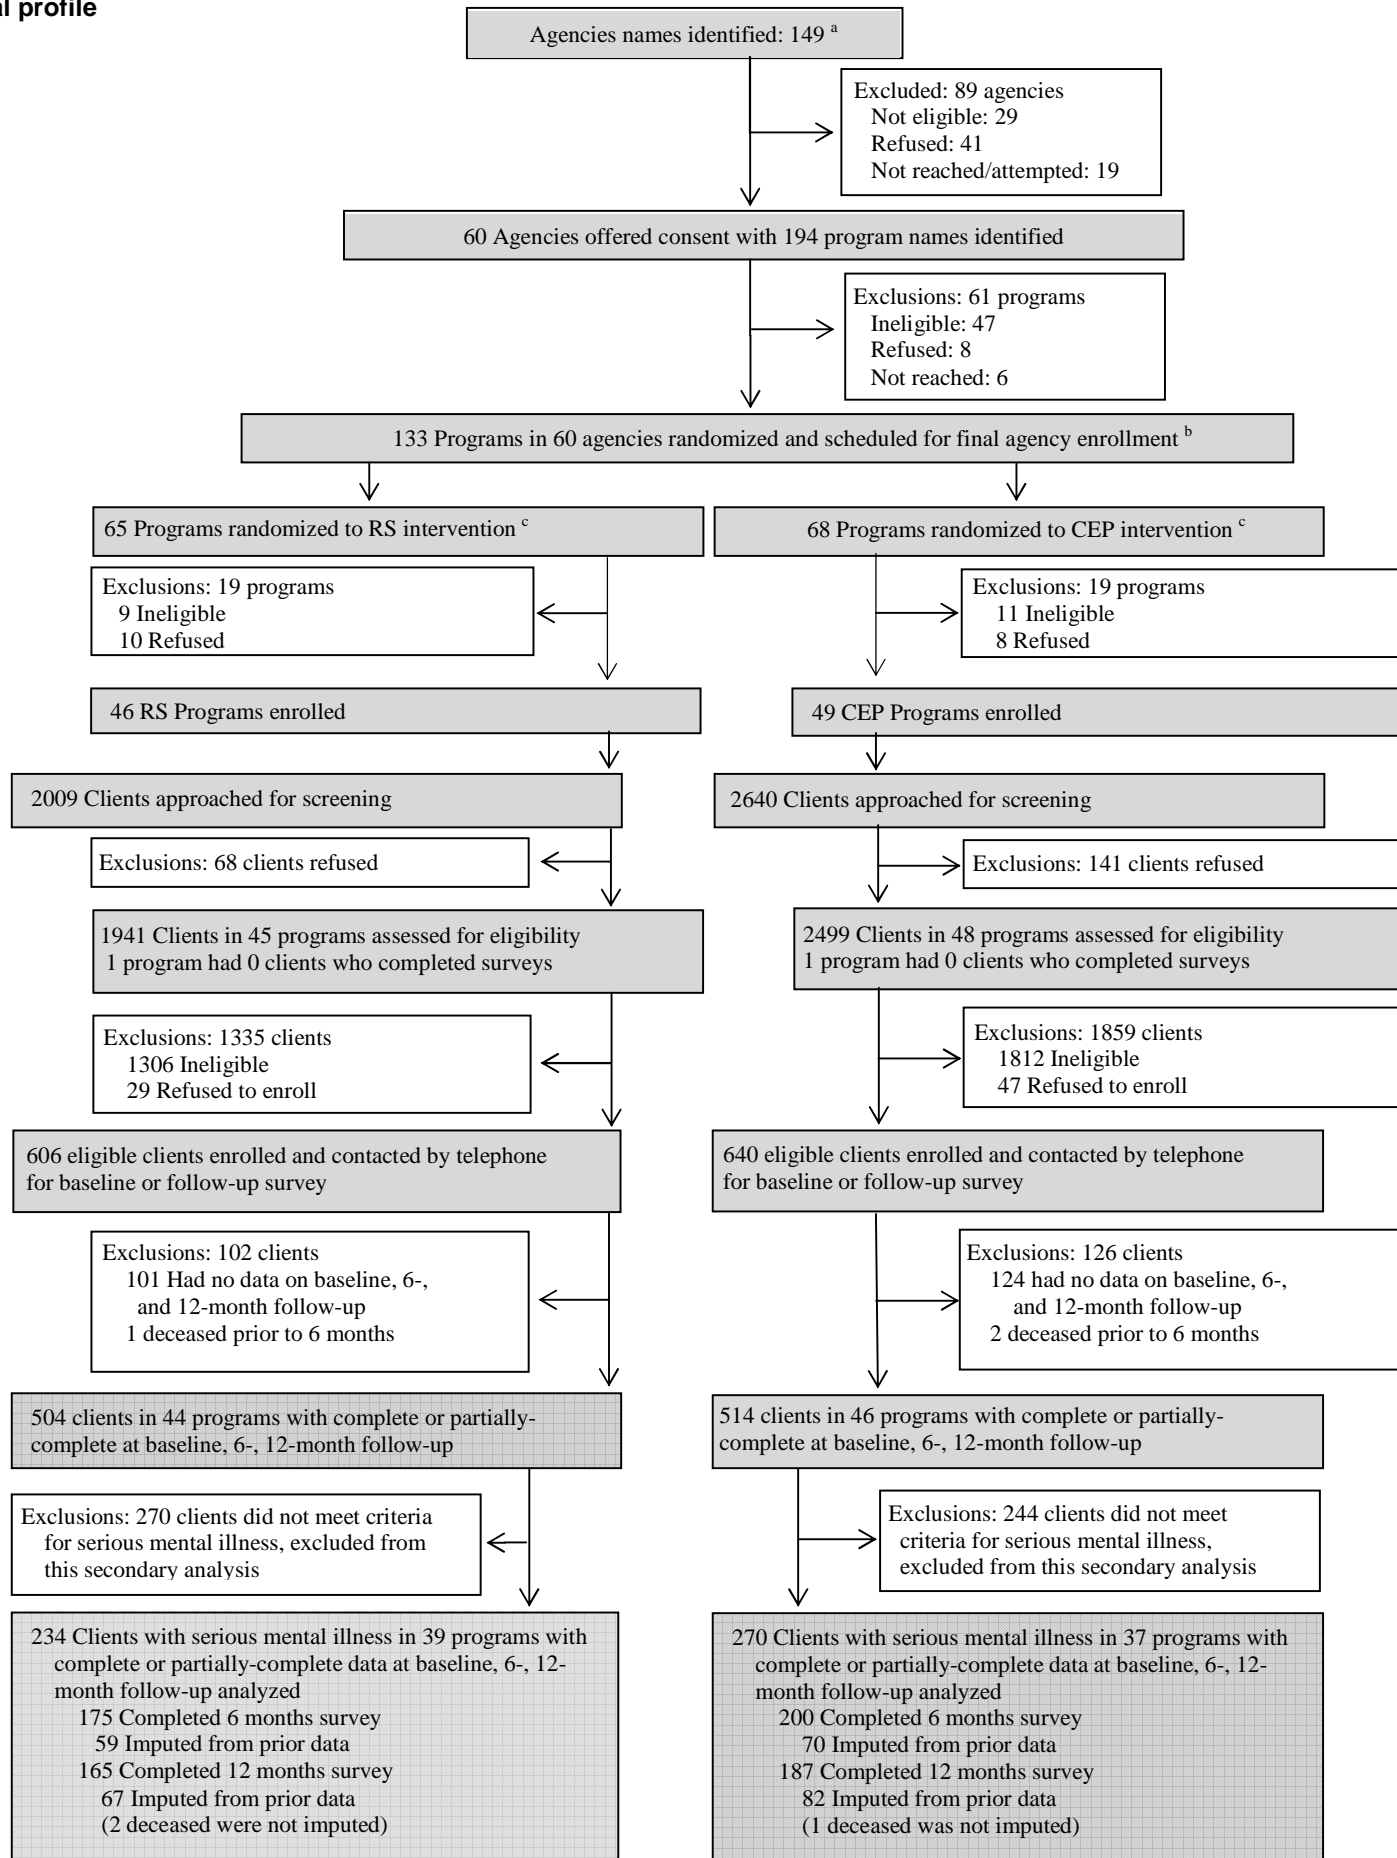

Footnotes:

<sup>a</sup>Agency eligibility criteria: agencies had to provide services for adults or parents of child clients and be financially stable, i.e., not expecting to close during the study time period. Agencies were entities with administrative responsibilities

<sup>b</sup>Program eligibility criteria: programs had to serve at least 15 clients per week, have one or more staff, not focused on psychotic disorders or home services, and be willing to identify a staff liaison

<sup>c</sup>Within sectors, programs were matched on client size and smaller programs (faith-based, hair salons) were joined based on established relationships. Programs/clusters were randomized within communities, but a few unique programs were randomized across communities. We used a random number generator and CPIC Council members who provided seed numbers to initiate randomization. Randomization was overseen by a statistician not involved in recruitment.

## Supplementary Appendix for

# Comparative Effectiveness of Community Coalitions and Program Technical Support for Depression Quality Improvement on Adults with Serious Mental Illness in Under-Resourced Communities

**Table S1. CPIC parent study screening, enrollment, and data completion status by service sector<sup>a</sup>**

|                                                                                        | Overall |      | Primary care |      | Mental health |      | Substance abuse |      | Homeless |      | Social community |      |
|----------------------------------------------------------------------------------------|---------|------|--------------|------|---------------|------|-----------------|------|----------|------|------------------|------|
|                                                                                        | N       | %    | N            | %    | N             | %    | N               | %    | N        | %    | N                | %    |
| Total approached for screening                                                         | 4649    |      | 1478         |      | 463           |      | 827             |      | 673      |      | 1208             |      |
| Refused screening                                                                      | 209     |      | 79           |      | 5             |      | 28              |      | 17       |      | 80               |      |
| Screened                                                                               | 4440    |      | 1399         |      | 458           |      | 799             |      | 656      |      | 1128             |      |
| Screened but not eligible for study                                                    |         |      |              |      |               |      |                 |      |          |      |                  |      |
| Modified PHQ-8<10                                                                      | 2965    | 66.8 | 905          | 64.7 | 221           | 48.3 | 520             | 65.1 | 400      | 61.0 | 919              | 81.5 |
| Modified PHQ-8≥10 but no contact information provided                                  | 153     | 3.4  | 89           | 6.4  | 5             | 1.1  | 5               | 0.6  | 43       | 6.6  | 11               | 1.0  |
| Eligible for study                                                                     |         |      |              |      |               |      |                 |      |          |      |                  |      |
| Eligible but refused                                                                   | 76      | 1.7  | 32           | 2.3  | 10            | 2.2  | 4               | 0.5  | 8        | 1.2  | 22               | 2.0  |
| Eligible and enrolled                                                                  | 1246    | 28.1 | 373          | 26.7 | 222           | 48.5 | 270             | 33.8 | 205      | 31.3 | 176              | 15.6 |
| Excluded from the CPIC parent study sample                                             |         |      |              |      |               |      |                 |      |          |      |                  |      |
| No data on baseline, 6-mo, and 12-mo follow-up or deceased prior to 6 month            | 228     | 18.3 | 83           | 22.3 | 27            | 12.2 | 40              | 14.8 | 43       | 21.0 | 35               | 19.9 |
| Parent study sample: completed 1 or more surveys at baseline, 6-mo, or 12-mo follow-up | 1018    | 81.7 | 290          | 77.7 | 195           | 87.8 | 230             | 85.2 | 162      | 79.0 | 141              | 80.1 |
| SMI status of CPIC parent study sample <sup>b</sup>                                    |         |      |              |      |               |      |                 |      |          |      |                  |      |
| Without serious mental illness                                                         | 514     | 50.5 | 173          | 59.8 | 88            | 45.1 | 86              | 37.2 | 70       | 43.3 | 96               | 68.4 |
| With serious mental illness                                                            | 504     | 49.5 | 117          | 40.2 | 107           | 54.9 | 144             | 62.8 | 92       | 56.7 | 45               | 31.6 |
| <b>Subgroup with serious mental illness<sup>b</sup></b>                                |         |      |              |      |               |      |                 |      |          |      |                  |      |
| Completed 6-mo survey                                                                  | 375     | 74.5 | 91           | 78.4 | 84            | 78.9 | 97              | 66.9 | 69       | 74.9 | 35               | 77.6 |
| Imputed from prior data                                                                | 129     | 25.5 | 25           | 21.6 | 23            | 21.1 | 48              | 33.1 | 23       | 25.1 | 10               | 22.4 |
| Completed 12-mo survey                                                                 | 352     | 70.2 | 80           | 70.1 | 75            | 70.8 | 90              | 62.5 | 72       | 78.3 | 35               | 77.8 |
| Imputed from prior data <sup>c</sup>                                                   | 149     | 29.8 | 34           | 29.9 | 31            | 28.2 | 54              | 37.5 | 20       | 21.7 | 10               | 22.2 |

<sup>a</sup>Serious mental illness, defined as the presence of 1 or more of the following: severe major depressive disorder (PHQ-8 score ≥ 20), lifetime history of bipolar disorder or psychosis

<sup>b</sup>Total participants in each row below may not sum to numbers in the “Overall” column due to imputation procedures for missing data

<sup>c</sup>2 deceased in Primary Care and 1 in Mental Health were not imputed

**TABLE S2. Intervention effects on primary and community-prioritized outcomes at 12 months among participants with serious mental illness<sup>a</sup>**

|                                                                     | Unadjusted Estimates <sup>b</sup> |     |    |            |     |    | Adjusted Analysis <sup>c</sup> |          |      |
|---------------------------------------------------------------------|-----------------------------------|-----|----|------------|-----|----|--------------------------------|----------|------|
|                                                                     | RS                                |     |    | CEP        |     |    | CEP vs RS                      |          |      |
|                                                                     | Total<br>N                        | N   | %  | Total<br>N | N   | %  | OR                             | 95% CI   | p    |
| Primary outcomes                                                    |                                   |     |    |            |     |    |                                |          |      |
| Poor mental health quality of life (MCS-12 $\leq$ 40) <sup>d</sup>  | 159                               | 88  | 55 | 177        | 92  | 52 | .84                            | .55-1.28 | .407 |
| PHQ-9 $\geq$ 10 <sup>e</sup>                                        | 160                               | 122 | 76 | 176        | 124 | 71 | .88                            | .53-1.46 | .614 |
| Community-prioritized (secondary)                                   |                                   |     |    |            |     |    |                                |          |      |
| Mental wellness <sup>f</sup>                                        | 162                               | 59  | 36 | 178        | 74  | 42 | 1.17                           | .62-2.18 | .608 |
| Homelessness or $\geq$ 2 risk factors for homelessness <sup>g</sup> | 160                               | 64  | 40 | 177        | 66  | 37 | .95                            | .59-1.53 | .819 |
| Any behavioral health hospitalizations, past 6 months               | 162                               | 8   | 5  | 178        | 11  | 6  | .87                            | .37-2.06 | .751 |

<sup>a</sup> Serious mental illness, defined as the presence of 1 or more of the following: severe major depressive disorder (PHQ-8 score  $\geq$  20), lifetime history of bipolar disorder or psychosis

<sup>b</sup> Raw data without weighting or imputation

<sup>c</sup> Adjusted analyses used multiply imputed data, weighted for eligible sample for enrollment; logistic regression models adjusted for baseline status of the dependent variable, age, race/ethnicity, 12-month depressive disorder, and community and accounted for the design effect of the cluster randomization

<sup>d</sup> MCS-12 = mental component summary score of the Short Form-12. MCS-12  $\leq$  40 = one standard deviation below the population mean

<sup>e</sup> Nine-item PHQ. Possible scores range from 0 to 27, with higher scores indicating greater depression severity

<sup>f</sup> At least good bit of time on any of three items: feeling peaceful or calm, being a happy person, having energy

<sup>g</sup> Homeless or living in a shelter, or at least two risk factors of four (at least two nights homeless, food insecurity, eviction, financial crisis)

**TABLE S3. Intervention effects on services utilization at 12 months among participants with serious mental illness<sup>a</sup>**

|                                                                | Unadjusted Estimates <sup>b</sup> |      |      |            |      |      | Adjusted Analysis <sup>c</sup> |          |      |
|----------------------------------------------------------------|-----------------------------------|------|------|------------|------|------|--------------------------------|----------|------|
|                                                                | RS                                |      |      | CEP        |      |      | CEP vs RS                      |          |      |
|                                                                | Total<br>N                        | M    | SD   | Total<br>N | M    | SD   | IRR                            | 95% CI   | p    |
| Healthcare sector visits for depression <sup>d,e</sup>         | 160                               | 11.1 | 25.1 | 177        | 13.2 | 24.9 | 1.06                           | .65-1.72 | .821 |
| Outpatient primary care services for depression                | 161                               | 1.0  | 2.8  | 177        | 1.1  | 2.8  | 1.19                           | .57-2.48 | .629 |
| Mental health outpatient visits                                | 161                               | 7.1  | 17.7 | 177        | 7.0  | 13.1 | .92                            | .61-1.39 | .678 |
| Mental health outpatient visits received advice for medication | 159                               | 3.6  | 8.6  | 177        | 4.4  | 9.8  | 1.06                           | .64-1.75 | .817 |
| Mental health outpatient visits received counseling            | 160                               | 4.7  | 9.8  | 177        | 5.3  | 11.6 | .97                            | .59-1.62 | .920 |
| Community sector visit for depression <sup>f</sup>             | 161                               | 3.0  | 1.9  | 177        | 5.3  | 23.8 | 1.54                           | .69-3.44 | .284 |
| Religious services for depression                              | 161                               | 2.0  | 1.6  | 177        | 1.2  | 7.1  | .71                            | .26-1.92 | .489 |

<sup>a</sup> Serious mental illness, defined as the presence of 1 or more of the following: severe major depressive disorder (PHQ-8 score  $\geq 20$ ), lifetime history of bipolar disorder or psychosis.

<sup>b</sup> Raw data without weighting or imputation

<sup>c</sup> Adjusted analyses used multiply imputed data, weighted for eligible sample for enrollment; Poisson regression models (presented as incidence rate ratios, IRR), adjusted for baseline status of the dependent variable, age, race/ethnicity, 12-month depressive disorder, and community and accounted for the design effect of the cluster randomization

<sup>d</sup> Total healthcare sector visits for depression defined as outpatient primary care services for depression; emergency or urgent care visits for alcohol, drug, and mental health problems; mental health specialty outpatient visits; outpatient substance abuse services for depression

<sup>e</sup> For all service settings, depression-related visits were defined as services for which clients reported talking about depression or medications for depression; counseling for depression, stress, or emotional problems; or being referred to specialty mental health services

<sup>f</sup> Community sector visits for depression defined as homeless and social/community sector services for depression

## Longitudinal analysis

Although the study design called for the CEP intervention to be active only during the first 6 months post-baseline, as a sensitivity analysis, we conducted a longitudinal analysis using all waves of data (baseline, 6 months, 12 months) without response weights, adjusting for the same set of baseline covariates as in the primary analysis. We carried out analyses both on data sets where imputation procedures encompassed the entire duration of the study and on data sets where only baseline values were imputed, thereby relying on the implicit missing-at-random assumption widely invoked in analyses using mixed-effects models for unbalanced repeated measures(1). For these longitudinal analyses, the PHQ-8 instead of PHQ-9 was used as a primary outcome (depression severity cut-points for both scales are the same,  $\geq 10$ ; PHQ-8 does not include suicide risk item), as PHQ-8 data was available at all time points(2). The PHQ-9 was administered in the 6- and 12-month follow-up surveys but not at baseline.

In analyzing a binary dependent variable (e.g.  $MCS12 \leq 40$ ), we fitted a 3-level mixed-effect logistic regression models using the GLIMMIX procedure, incorporating terms for intervention condition, time point, and condition-by-time-point interactions and considering alternative covariance structures. From the fitted model, we evaluated a contrast involving a linear combination of coefficients to test intervention effects at each endpoint (baseline, 6 months, 12 months) and tested differences between intervention groups in change from baseline to 6 months, and 12 months. For count variables (e.g. number of healthcare sector visits for depression), the GLIMMIX procedure with the Poisson distribution failed to converge. As a result, we only present results from mixed-effect logistic regression models for binary outcomes based on raw data. The results are presented in Tables S4.

We also utilized a generalized estimating equation (GEE) framework with a logistic link for binary outcomes and a Poisson link for count data across multiply imputed datasets. Specifically, we used the SAS GENMOD procedure assuming exchangeable correlation at the program level. The results are presented in Tables S5-6.

## References

1. Collins LM, Schafer JL, Kam C-M: A comparison of inclusive and restrictive strategies in modern missing data procedures. *Psychological Methods* 6: 330–351, 2001.
2. Kroenke K, Strine TW, Spitzer RL, et al.: The PHQ-8 as a measure of current depression in the general population. *Journal of affective disorders* 114: 163–173, 2009.

**TABLE S4. Intervention effects on primary and community-prioritized outcomes from mixed-effect logistic regression models<sup>a b</sup>**

| Primary outcomes                                                    | CEP vs. RS<br>at specific time |           |      | CEP vs. RS in change<br>from baseline |           |      |
|---------------------------------------------------------------------|--------------------------------|-----------|------|---------------------------------------|-----------|------|
|                                                                     | OR                             | 95% CI    | p    | OR                                    | 95% CI    | p    |
| Poor mental health quality of life (MCS-12 $\leq$ 40) <sup>c</sup>  |                                |           |      |                                       |           |      |
| Baseline                                                            | .96                            | .64-1.44  | .852 |                                       |           |      |
| 6-month follow-up                                                   | .58                            | .38-.89   | .013 | .61                                   | .35-1.04  | .069 |
| 12-month follow-up                                                  | .92                            | .60-1.40  | .687 | .95                                   | .54-1.69  | .867 |
| PHQ-8 $\geq$ 10 <sup>d</sup>                                        |                                |           |      |                                       |           |      |
| Baseline                                                            | 1.29                           | .46-3.64  | .63  |                                       |           |      |
| 6-month follow-up                                                   | .54                            | .31-.94   | .029 | .42                                   | .14-1.21  | .108 |
| 12-month follow-up                                                  | .68                            | .41-1.14  | .143 | .53                                   | .17-1.71  | .287 |
| Community-prioritized (secondary)                                   |                                |           |      |                                       |           |      |
| Mental wellness <sup>e</sup>                                        |                                |           |      |                                       |           |      |
| Baseline                                                            | 1.00                           | .64-1.56  | .993 |                                       |           |      |
| 6-month follow-up                                                   | 1.89                           | 1.17-3.05 | .01  | 1.89                                  | 1.05-3.39 | .033 |
| 12-month follow-up                                                  | 1.44                           | .91-2.27  | .121 | 1.44                                  | .78-2.65  | .242 |
| Homelessness or $\geq$ 2 risk factors for homelessness <sup>f</sup> |                                |           |      |                                       |           |      |
| Baseline                                                            | .52                            | .32-.86   | .01  |                                       |           |      |
| 6-month follow-up                                                   | .42                            | .25-.71   | .001 | .81                                   | .46-1.42  | .458 |
| 12-month follow-up                                                  | .69                            | .41-1.15  | .157 | 1.32                                  | .72-2.40  | .369 |
| Any behavioral health hospitalizations, past 6 months               |                                |           |      |                                       |           |      |
| Baseline                                                            | 1.39                           | .84-2.32  | .199 |                                       |           |      |
| 6-month follow-up                                                   | .56                            | .28-1.11  | .094 | .40                                   | .18-.86   | .02  |
| 12-month follow-up                                                  | .86                            | .38-1.95  | .717 | .62                                   | .24-1.55  | .303 |

<sup>a</sup>Serious mental illness, defined as the presence of 1 or more of the following: severe major depressive disorder (PHQ-8 score  $\geq$  20), lifetime history of bipolar disorder or psychosis

<sup>b</sup>Adjusted analyses used data sets where only baseline values were imputed; 3-level mixed-effect logistic regression models adjusted for age, race/ethnicity, education, 12-month depressive disorder, and community.

<sup>c</sup> MCS-12 = mental component summary score of the Short Form-12. MCS-12  $\leq$  40 = one standard deviation below the population mean

<sup>d</sup> Eight-item PHQ. Possible scores range from 0 to 24, with higher scores indicating greater depression severity

<sup>e</sup> At least good bit of time on any of three items: feeling peaceful or calm, being a happy person, having energy

<sup>f</sup> Homeless or living in a shelter, or at least two risk factors of four (at least two nights homeless, food insecurity, eviction, financial crisis)

**TABLE S5. Intervention effects on primary and community-prioritized outcomes from logistic regression models with generalized estimating equations<sup>a b</sup>**

| Primary outcomes                                                    | CEP vs. RS<br>at specific time |           |       | CEP vs. RS in change<br>from baseline |          |      |
|---------------------------------------------------------------------|--------------------------------|-----------|-------|---------------------------------------|----------|------|
|                                                                     | OR                             | 95% CI    | p     | OR                                    | 95% CI   | p    |
| Poor mental health quality of life (MCS-12 $\leq$ 40) <sup>c</sup>  |                                |           |       |                                       |          |      |
| Baseline                                                            | .95                            | .65-1.39  | .798  |                                       |          |      |
| 6-month follow-up                                                   | .61                            | .41-.92   | .019  | .64                                   | .37-1.10 | .107 |
| 12-month follow-up                                                  | .82                            | .56-1.20  | .302  | .86                                   | .51-1.46 | .571 |
| PHQ-8 $\geq$ 10 <sup>d</sup>                                        |                                |           |       |                                       |          |      |
| Baseline                                                            | 1.10                           | .48-2.53  | .812  |                                       |          |      |
| 6-month follow-up                                                   | .66                            | .37-1.18  | .156  | .60                                   | .25-1.47 | .264 |
| 12-month follow-up                                                  | .77                            | .50-1.17  | .217  | .69                                   | .27-1.75 | .437 |
| Community-prioritized (secondary)                                   |                                |           |       |                                       |          |      |
| Mental wellness <sup>e</sup>                                        |                                |           |       |                                       |          |      |
| Baseline                                                            | 1.06                           | .73-1.54  | .744  |                                       |          |      |
| 6-month follow-up                                                   | 1.69                           | 1.05-2.73 | .032  | 1.59                                  | .99-2.56 | .054 |
| 12-month follow-up                                                  | 1.27                           | .79-2.04  | .308  | 1.20                                  | .63-2.27 | .568 |
| Homelessness or $\geq$ 2 risk factors for homelessness <sup>f</sup> |                                |           |       |                                       |          |      |
| Baseline                                                            | .56                            | .35-.89   | .015  |                                       |          |      |
| 6-month follow-up                                                   | .51                            | .35-.75   | <.001 | .91                                   | .56-1.47 | .702 |
| 12-month follow-up                                                  | .70                            | .43-1.13  | .141  | 1.26                                  | .66-2.39 | .477 |
| Any behavioral health hospitalizations, past 6 months               |                                |           |       |                                       |          |      |
| Baseline                                                            | 1.38                           | .90-2.10  | .137  |                                       |          |      |
| 6-month follow-up                                                   | .56                            | .32-1.00  | .05   | .41                                   | .22-.77  | .005 |
| 12-month follow-up                                                  | .78                            | .38-1.63  | .505  | .57                                   | .25-1.28 | .17  |

<sup>a</sup>Serious mental illness, defined as the presence of 1 or more of the following: severe major depressive disorder (PHQ-8 score  $\geq$  20), lifetime history of bipolar disorder or psychosis

<sup>b</sup>Adjusted analyses used multiply imputed data; logistic regression models with generalized estimating equations (GEE) adjusted for age, race/ethnicity, education, 12-month depressive disorder, and community.

<sup>c</sup>MCS-12 = mental component summary score of the Short Form-12. MCS-12  $\leq$  40 = one standard deviation below the population mean

<sup>d</sup>Eight-item PHQ. Possible scores range from 0 to 24, with higher scores indicating greater depression severity

<sup>e</sup>At least good bit of time on any of three items: feeling peaceful or calm, being a happy person, having energy

<sup>f</sup>Homeless or living in a shelter, or at least two risk factors of four (at least two nights homeless, food insecurity, eviction, financial crisis)



**TABLE S6. Intervention effects on service utilization from Poisson regression models with generalized estimating equations<sup>a b</sup>**

|                                                                          | CEP vs. RS<br>at specific Time |          |      | CEP vs. RS in change<br>from baseline |          |      |
|--------------------------------------------------------------------------|--------------------------------|----------|------|---------------------------------------|----------|------|
|                                                                          | IRR                            | 95% CI   | p    | IRR                                   | 95% CI   | p    |
| <b>Healthcare sector visits for depression<sup>c d</sup></b>             |                                |          |      |                                       |          |      |
| Baseline                                                                 | .96                            | .70-1.31 | .79  |                                       |          |      |
| 6-month follow-up                                                        | .90                            | .59-1.38 | .624 | .94                                   | .61-1.45 | .773 |
| 12-month follow-up                                                       | .94                            | .61-1.46 | .798 | .99                                   | .58-1.67 | .957 |
| <b>Outpatient primary care services for depression</b>                   |                                |          |      |                                       |          |      |
| Baseline                                                                 | 1.18                           | .77-1.80 | .44  |                                       |          |      |
| 6-month follow-up                                                        | 1.17                           | .74-1.87 | .496 | .99                                   | .56-1.77 | .986 |
| 12-month follow-up                                                       | 1.00                           | .52-1.91 | .994 | .85                                   | .36-1.97 | .688 |
| <b>Mental health outpatient visits</b>                                   |                                |          |      |                                       |          |      |
| Baseline                                                                 | .92                            | .62-1.37 | .683 |                                       |          |      |
| 6-month follow-up                                                        | .65                            | .41-1.05 | .078 | .71                                   | .46-1.09 | .114 |
| 12-month follow-up                                                       | .81                            | .47-1.40 | .445 | .88                                   | .50-1.54 | .646 |
| <b>Mental health outpatient visits received advice for medication</b>    |                                |          |      |                                       |          |      |
| Baseline                                                                 | 1.15                           | .81-1.63 | .432 |                                       |          |      |
| 6-month follow-up                                                        | .52                            | .32-.83  | .006 | .45                                   | .27-.74  | .002 |
| 12-month follow-up                                                       | .83                            | .51-1.35 | .451 | .72                                   | .44-1.19 | .2   |
| <b>Mental health outpatient visits received counseling past 6 months</b> |                                |          |      |                                       |          |      |
| Baseline                                                                 | 1.13                           | .72-1.77 | .588 |                                       |          |      |
| 6-month follow-up                                                        | .56                            | .35-.90  | .016 | .50                                   | .29-.85  | .011 |
| 12-month follow-up                                                       | .88                            | .51-1.53 | .646 | .78                                   | .45-1.35 | .365 |
| <b>Community sector visit for depression<sup>e</sup></b>                 |                                |          |      |                                       |          |      |
| Baseline                                                                 | 1.06                           | .59-1.92 | .836 |                                       |          |      |
| 6-month follow-up                                                        | 1.19                           | .60-2.35 | .612 | 1.12                                  | .51-2.45 | .777 |
| 12-month follow-up                                                       | 1.68                           | .81-3.51 | .165 | 1.58                                  | .59-4.24 | .361 |
| <b>Religious services for depression</b>                                 |                                |          |      |                                       |          |      |
| Baseline                                                                 | .90                            | .48-1.68 | .731 |                                       |          |      |
| 6-month follow-up                                                        | 1.29                           | .61-2.73 | .502 | 1.44                                  | .63-3.31 | .387 |
| 12-month follow-up                                                       | .92                            | .37-2.27 | .849 | 1.02                                  | .34-3.04 | .966 |

<sup>a</sup>Serious mental illness, defined as the presence of 1 or more of the following: severe major depressive disorder

(PHQ-8 score  $\geq 20$ ), lifetime history of bipolar disorder or psychosis

<sup>b</sup>Adjusted analyses used multiply imputed data; Poisson regression models with generalized estimating equations (GEE) adjusted for age, race/ethnicity, education, 12-month depressive disorder, and community; IRR = incidence rate ratio.

<sup>c</sup>Total healthcare sector visits for depression defined as outpatient primary care services for depression; emergency or urgent care visits for alcohol, drug, and mental health problems; mental health specialty outpatient visits; outpatient substance abuse services for depression

<sup>d</sup>For all service settings, depression-related visits were defined as services for which clients reported talking about depression or medications for depression; counseling for depression, stress, or emotional problems; or being referred to specialty mental health services

<sup>e</sup>Community sector visits for depression defined as homeless and social/community sector services for depression

**TABLE S7. Intervention effects on primary and community-prioritized outcomes at 6 months from Intervention-by-serious mental illness interaction model**

|                                                                | Participants without SMI |           |      | Participants with SMI |           |      | Interaction effects |          |      |
|----------------------------------------------------------------|--------------------------|-----------|------|-----------------------|-----------|------|---------------------|----------|------|
|                                                                | CEP vs RS                |           |      | CEP vs RS             |           |      | OR                  | 95% CI   | p    |
|                                                                | OR                       | 95% CI    | p    | OR                    | 95% CI    | p    |                     |          |      |
| Primary outcomes                                               |                          |           |      |                       |           |      |                     |          |      |
| Poor mental health quality of life (MCS-12 ≤ 40) <sup>a</sup>  | .81                      | .55-1.19  | .279 | .63                   | .41-.96   | .032 | .78                 | .44-1.38 | .383 |
| PHQ-9 ≥ 10 <sup>b</sup>                                        | .92                      | .49-1.76  | .793 | .59                   | .30-1.18  | .121 | .64                 | .25-1.61 | .305 |
| Community-prioritized (secondary)                              |                          |           |      |                       |           |      |                     |          |      |
| Mental wellness <sup>c</sup>                                   | 1.61                     | 1.03-2.53 | .039 | 1.97                  | 1.10-3.52 | .026 | 1.22                | .62-2.41 | .557 |
| Homelessness or ≥ 2 risk factors for homelessness <sup>d</sup> | .76                      | .35-1.67  | .447 | .49                   | .29-.82   | .009 | .64                 | .24-1.70 | .322 |
| Any behavioral health hospitalizations, past 6 months          | .58                      | .11-3.04  | .477 | .45                   | .23-.90   | .024 | .78                 | .12-5.14 | .775 |

Intervention-by-Sector interaction models used multiply imputed data, weighted for eligible sample for enrollment; logistic regressions adjusted for baseline status of the dependent variable, age, race/ethnicity, 12-month depressive disorder, and community and accounted for the design effect of the cluster randomization. Serious mental illness, defined as the presence of 1 or more of the following: severe major depressive disorder (PHQ-8 score ≥ 20), lifetime history of bipolar disorder or psychosis.

<sup>a</sup> MCS-12 = mental component summary score of the Short Form-12. MCS-12 ≤ 40 = one standard deviation below the population mean.

<sup>b</sup> Nine-item PHQ. Possible scores range from 0 to 27, with higher scores indicating greater depression severity

<sup>c</sup> At least good bit of time on any of three items: feeling peaceful or calm, being a happy person, having energy

<sup>d</sup> Homeless or living in a shelter, or at least two risk factors of four (at least two nights homeless, food insecurity, eviction, financial crisis)

**TABLE S8. Intervention effects on services utilization at 6 months from Intervention-by-serious mental illness interaction model**

|                                                                 | Participants without SMI |          |      | Participants with SMI |           |       | Interaction effects |          |      |
|-----------------------------------------------------------------|--------------------------|----------|------|-----------------------|-----------|-------|---------------------|----------|------|
|                                                                 | CEP vs RS                |          |      | CEP vs RS             |           |       |                     |          |      |
|                                                                 | IRR                      | 95% CI   | p    | IRR                   | 95% CI    | p     | IRR                 | 95% CI   | p    |
| Healthcare sector visits for depression <sup>a,b</sup>          | 1.05                     | .34-3.30 | .914 | .87                   | .57-1.32  | .497  | .83                 | .31-2.21 | .666 |
| Outpatient primary care services for depression                 | 1.32                     | .74-2.33 | .330 | 1.13                  | .73-1.74  | .581  | .86                 | .42-1.76 | .664 |
| Mental health outpatient visits                                 | .83                      | .27-2.53 | .685 | .70                   | .44-1.10  | .118  | .85                 | .33-2.18 | .701 |
| Mental health outpatient visits, received advice for medication | .52                      | .15-1.79 | .241 | .43                   | .28-.66   | <.001 | .83                 | .27-2.58 | .717 |
| Mental health outpatient visits received counseling             | .87                      | .33-2.26 | .732 | .55                   | .35-.87   | .012  | .64                 | .29-1.42 | .249 |
| Community sector visit for depression <sup>c</sup>              | 1.99                     | .81-4.88 | .131 | 1.36                  | .67-2.78  | .393  | .68                 | .21-2.20 | .519 |
| Religious services for depression                               | 2.66                     | .93-7.61 | .067 | 2.84                  | 1.22-6.60 | .016  | 1.07                | .29-3.94 | .918 |

Intervention-by-Sector interaction models used multiply imputed data, weighted for eligible sample for enrollment; Poisson regressions adjusted for baseline status of the dependent variable, age, race/ethnicity, education, 12-month depressive disorder, and community and accounted for the design effect of the cluster randomization. Serious mental illness, defined as the presence of 1 or more of the following: severe major depressive disorder (PHQ-8 score  $\geq 20$ ), lifetime history of bipolar disorder or psychosis.

<sup>a</sup> Total healthcare sector visits for depression defined as outpatient primary care services for depression; emergency or urgent care visits for alcohol, drug, and mental health problems; mental health specialty outpatient visits; outpatient substance abuse services for depression

<sup>b</sup> For all service settings, depression-related visits were defined as services for which clients reported talking about depression or medications for depression; counseling for depression, stress, or emotional problems; or being referred to specialty mental health services

<sup>c</sup> Community sector visits for depression defined as homeless and social/community sector services for depression
